# Supplementary material for: Shadow enhancers can suppress input transcription factor noise through distinct regulatory logic
Source: eLife journal article supplement (doi:10.7554/elife.59351), 2020-08-17
Supplement: supp [file elife-59351-supp-v1.zip]

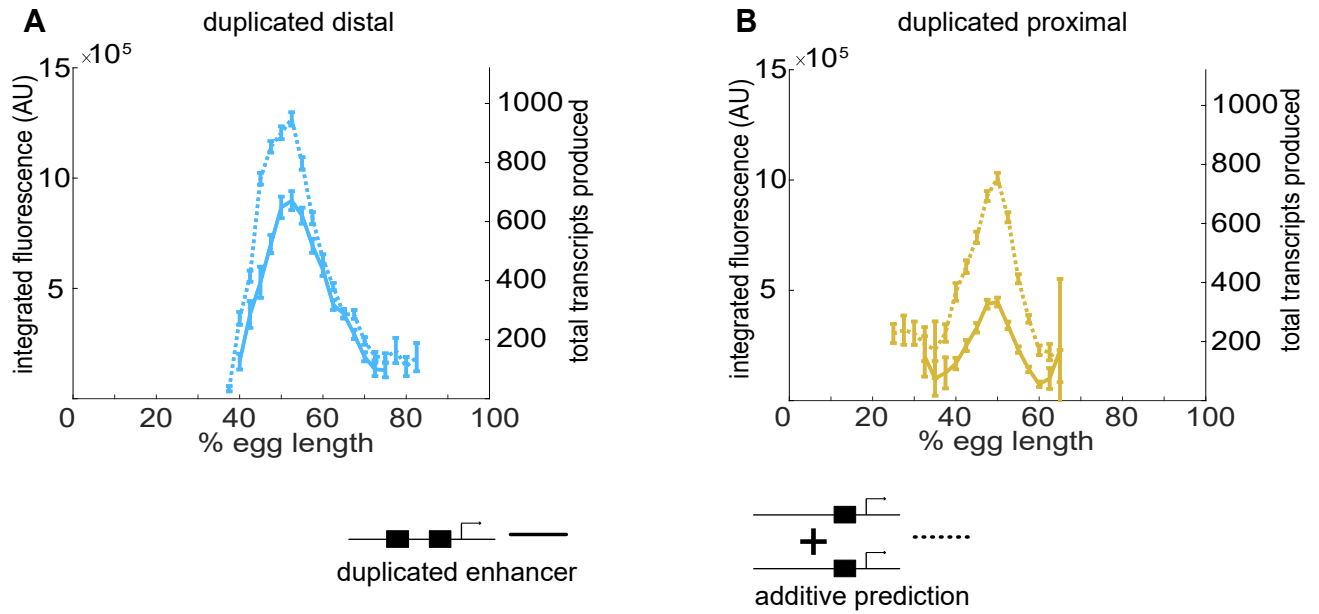

**Figure 5 - figure supplement 1: Individual *Kr* enhancers display sub-additive behavior.** To assess the way input from two enhancers is integrated at the *Kr* promoter, we compared the experimentally observed mRNA production of duplicated enhancers to that predicted from additive behavior of the single enhancers. **A.** The duplicated distal enhancer displays sub-additive behavior. The solid line is the experimentally observed total mRNA produced by the duplicated distal enhancer during nc14 as a function of egg length and the dotted line is that expected by doubling the total mRNA produced by the single distal enhancer. **B.** The duplicated proximal enhancer also acts sub-additively. The solid line is the experimentally observed total mRNA produced by the proximal enhancer during nc14 as a function of egg length and the dotted line is that expected by doubling the total mRNA produced by the single proximal enhancer. These results, along with the observation that  $k_{off}$  values increased and  $k_{on}$  values decreased in our model with the addition of a second enhancer, suggests that the *Kr* enhancers compete with each other for interactions with the promoter. Error bars represent 95% confidence intervals.
