# Supplementary material for: Shadow enhancers can suppress input transcription factor noise through distinct regulatory logic
Source: eLife journal article supplement (doi:10.7554/elife.59351), 2020-08-17
Supplement: supp [file elife-59351-supp-v1.zip]

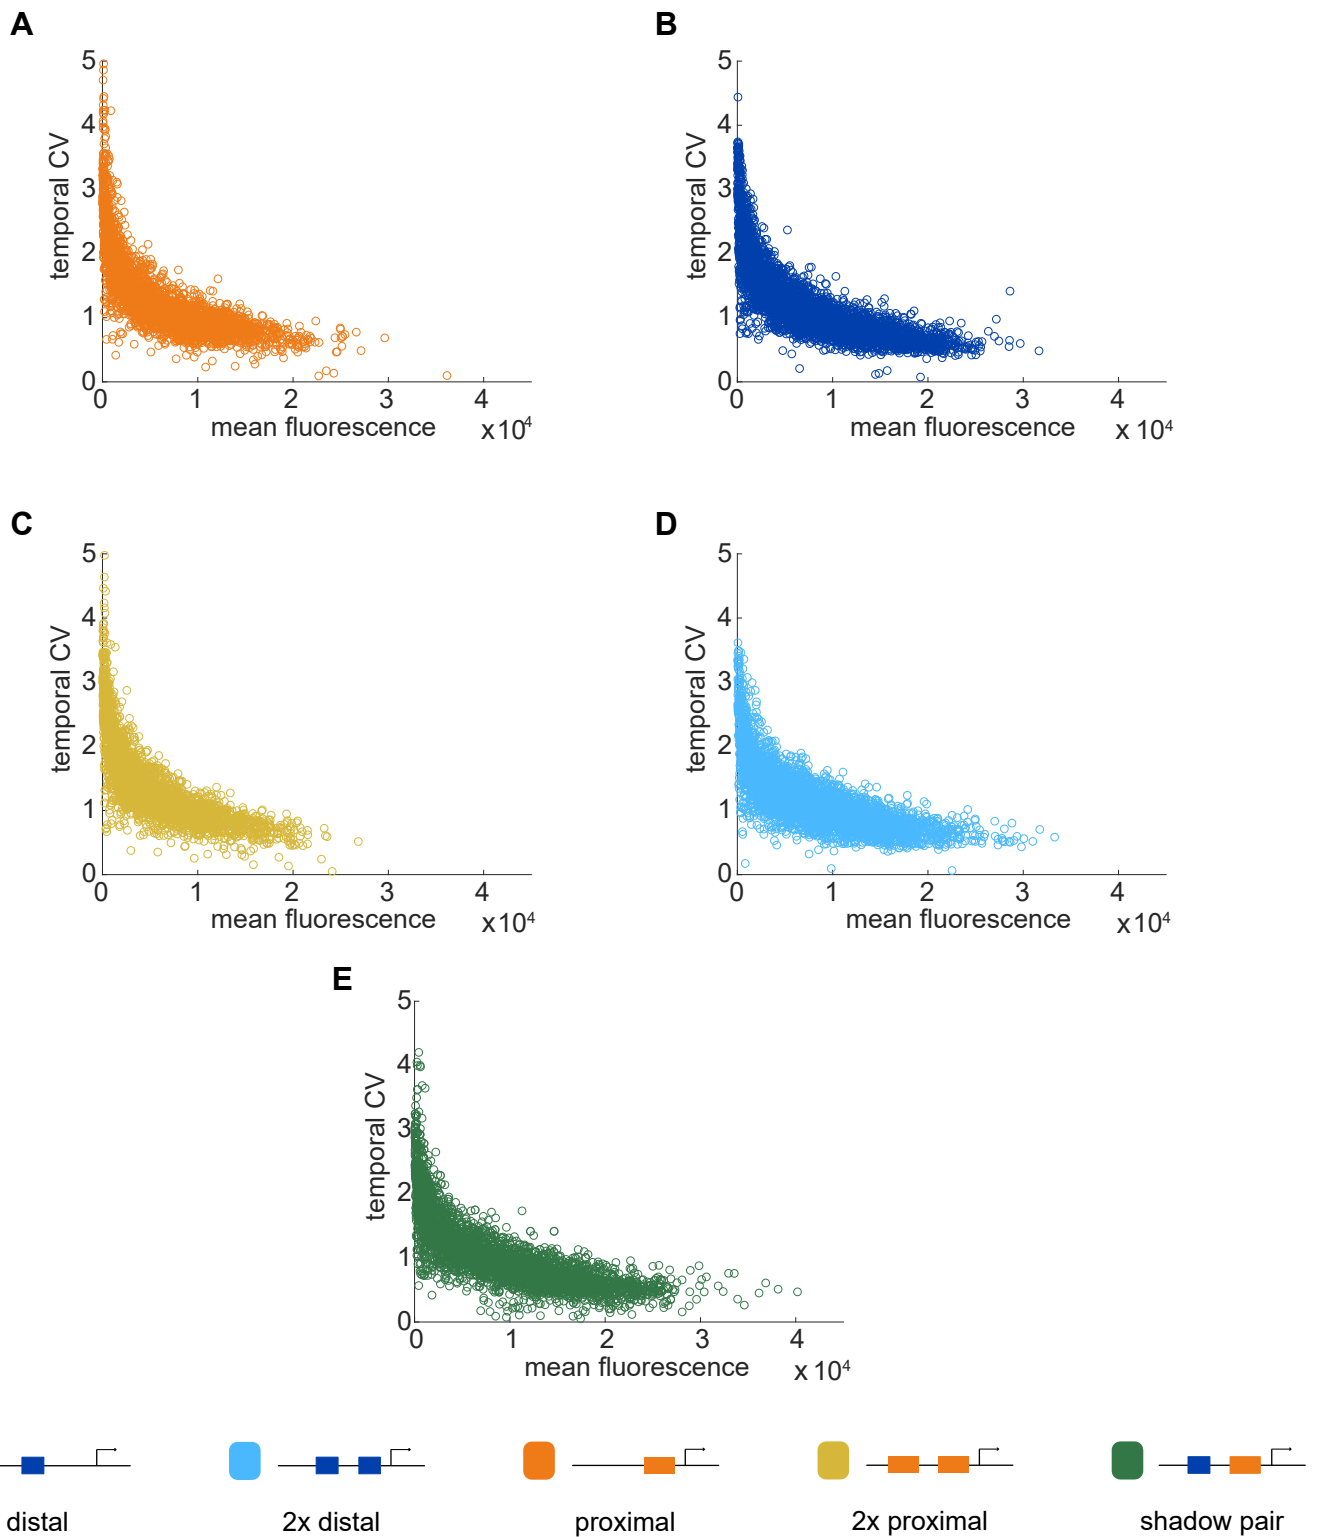

**Figure 4 - figure supplement 1: Temporal CV as a function of mean fluorescence.** To investigate the relationship between our noise measurement of temporal CV and the mean activity of each construct, we plotted the temporal CV of each transcription spot as a function of its mean fluorescence. **A.** Distal; **B.** Proximal; **C.** 2x Proximal; **D.** 2x Distal; **E.** Shadow pair. With all constructs, we find the general trend that CV decreases with increasing average expression, flattening out at a baseline noise level specific to each enhancer construct.
