# Supplementary material for: Shadow enhancers can suppress input transcription factor noise through distinct regulatory logic
Source: eLife journal article supplement (doi:10.7554/elife.59351), 2020-08-17
Supplement: supp [file elife-59351-supp-v1.zip]

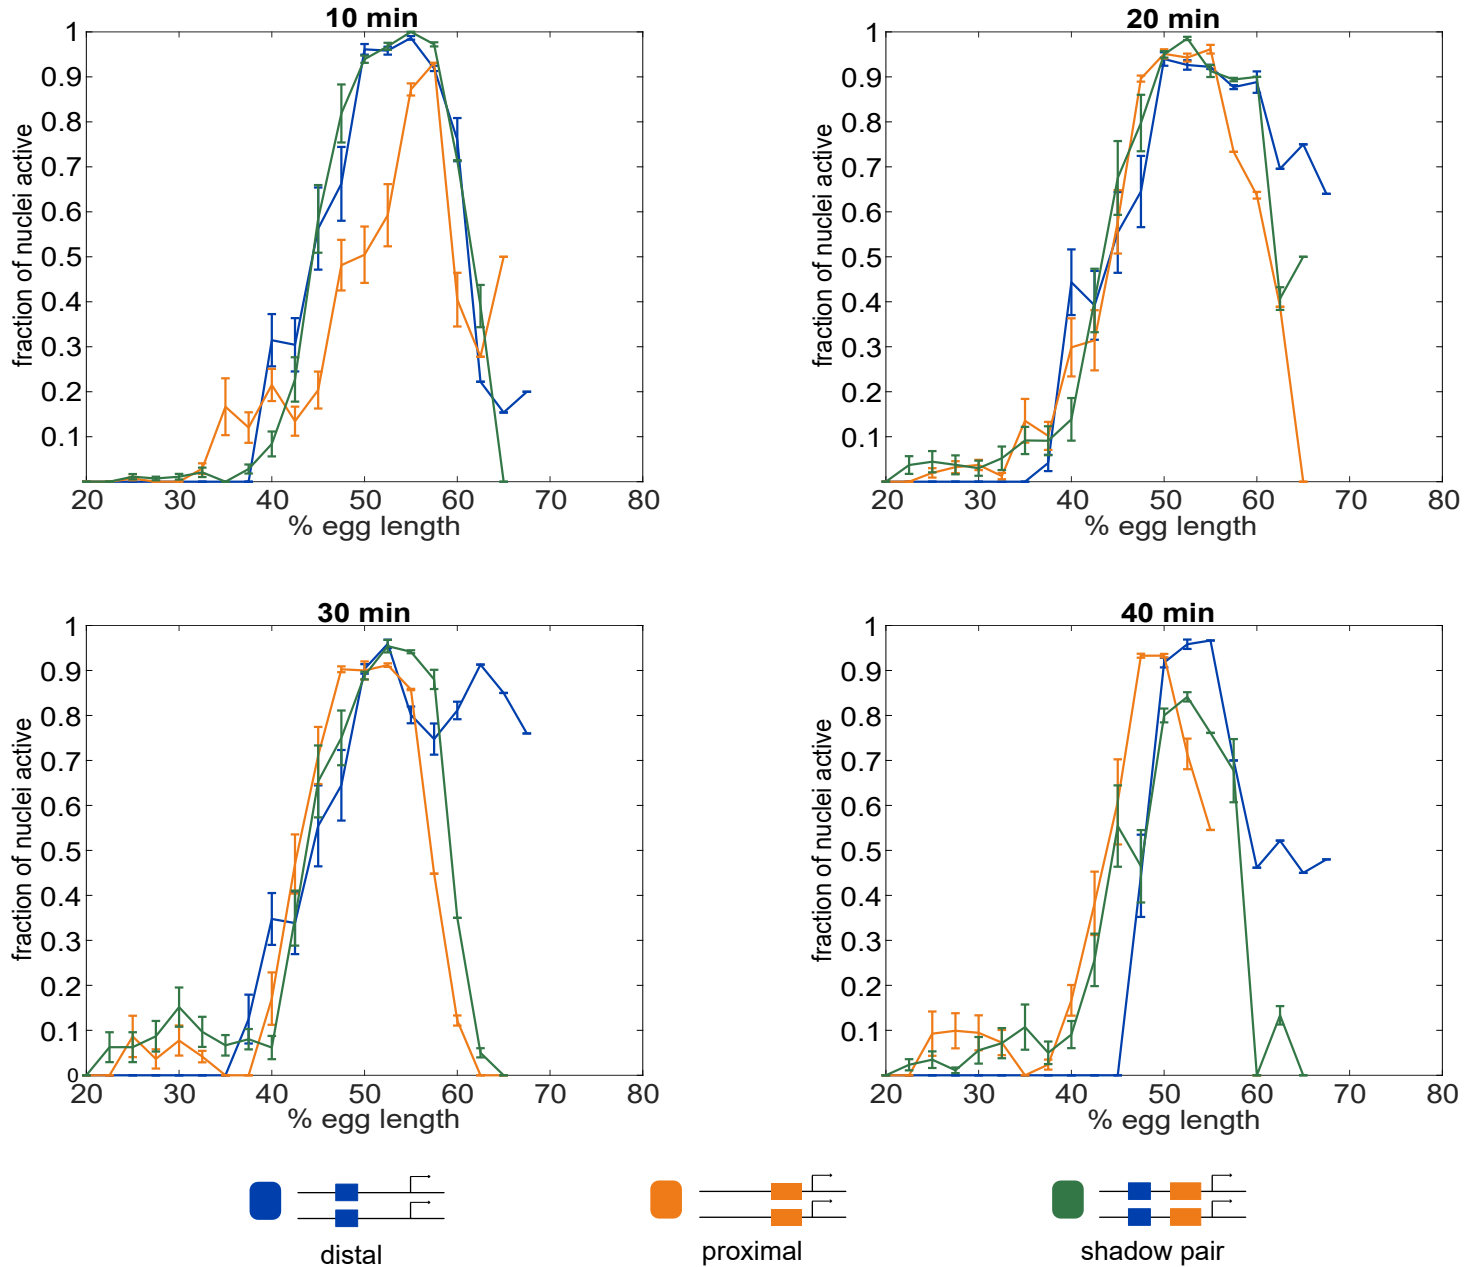

**Figure 1 - figure supplement 1: Fraction of nuclei transcribing as a function of embryo position.** The different enhancer constructs display different spatial and temporal patterns of activity. Shown in all graphs are the fraction of nuclei actively transcribing as a function of embryo position at each indicated time point into nc14. A. 10 minutes into nc14. B. 20 minutes into nc14. C. 30 minutes into nc14. D. 40 minutes into nc14. Error bars are 95% confidence intervals. We note that differences in the individual Kr enhancers become more pronounced throughout progression of nc14. The more anterior pattern driven by the proximal enhancer in the second half of nc14 mimics the anterior shift previously observed for the Kr expression domain (Jaeger, et al., 2004; El-Sherif & Levine, 2016).
