# Supplementary material for: Shadow enhancers can suppress input transcription factor noise through distinct regulatory logic
Source: eLife journal article supplement (doi:10.7554/elife.59351), 2020-08-17
Supplement: supp [file elife-59351-supp-v1.zip]

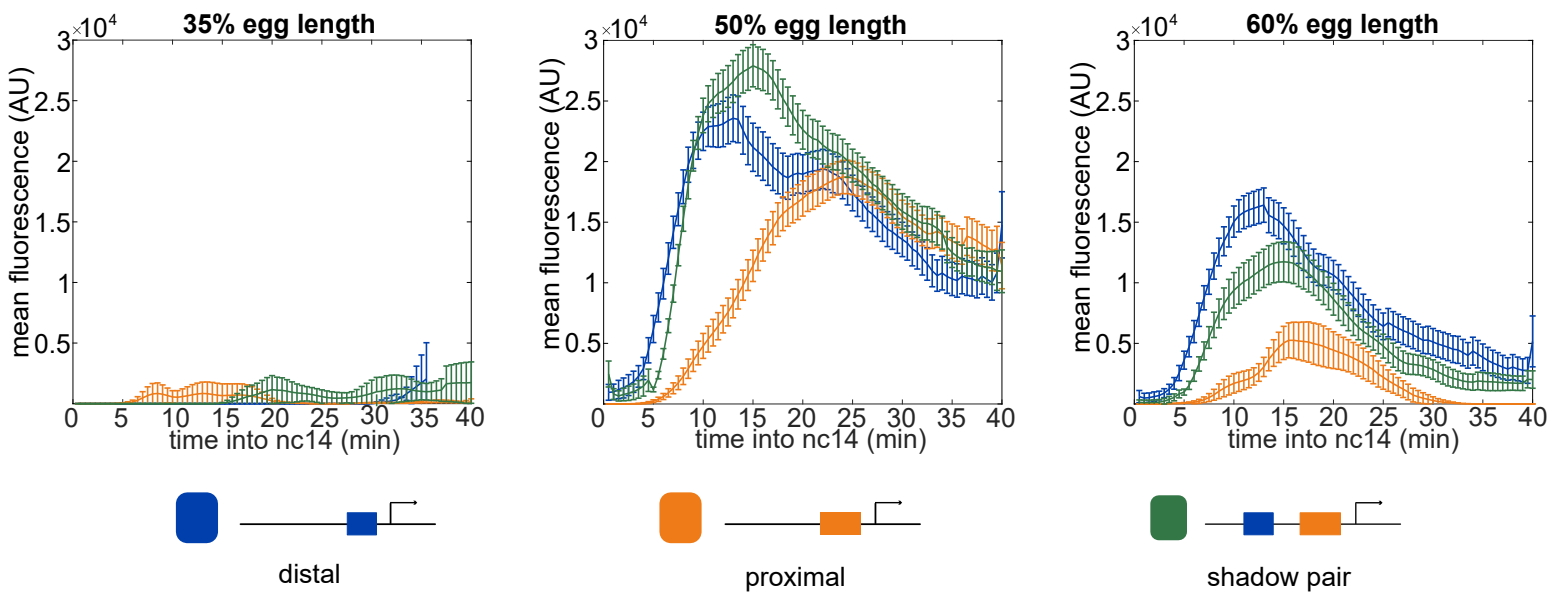

**Figure 1 - figure supplement 3: Expression across time at different embryo positions.** The activity levels of the different enhancer constructs vary both across time and space. Shown in each graph is the mean fluorescence of all transcriptional traces of the indicated enhancer construct as a function of time into nc14 at the indicated position in the embryo. The earlier activation of the shadow pair and distal enhancer compared to the proximal enhancer at 50% and 60% egg length may stem from the input of the pioneer TF Zelda (Zld) to the distal and shadow pair. Error bars are 95% confidence intervals.
