# Supplementary material for: Shadow enhancers can suppress input transcription factor noise through distinct regulatory logic
Source: eLife journal article supplement (doi:10.7554/elife.59351), 2020-08-17
Supplement: supp [file elife-59351-supp-v1.zip]

Archive with 25 entries (25 files):
- elife_poa_e59351_Supplementary_file_1.xls
- elife_poa_e59351_Supplementary_file_2.xls
- elife_poa_e59351_Supplementary_file_3.xls
- elife_poa_e59351_Supplementary_file_4.txt
- elife_poa_e59351_Transparent_Reporting_File.docx
- elife_poa_e59351_Video_1.avi
- elife_poa_e59351_Video_2.avi
- elife_poa_e59351_Video_3.avi
- elife_poa_e59351_Video_4.avi
- elife_poa_e59351_Video_5.avi
- elife_poa_e59351_Video_6.avi
- elife_poa_e59351_Video_7.avi
- elife_poa_e59351_Video_8.avi
- elife_poa_e59351_Figure_1_figure_supplement_1.pdf
- elife_poa_e59351_Figure_1_figure_supplement_2.pdf
- elife_poa_e59351_Figure_1_figure_supplement_3.pdf
- elife_poa_e59351_Figure_2_figure_supplement_1.pdf
- elife_poa_e59351_Figure_2_figure_supplement_2.pdf
- elife_poa_e59351_Figure_2_figure_supplement_3.pdf
- elife_poa_e59351_Figure_2_figure_supplement_4.pdf
- elife_poa_e59351_Figure_4_figure_supplement_1.pdf
- elife_poa_e59351_Figure_5_figure_supplement_1.pdf
- elife_poa_e59351_Figure_6_figure_supplement_1.pdf
- elife_poa_e59351_Figure_6_figure_supplement_2.pdf
- elife_poa_e59351_Figure_6_figure_supplement_3.pdf
