# Supplementary material for: Shadow enhancers can suppress input transcription factor noise through distinct regulatory logic
Source: eLife journal article supplement (doi:10.7554/elife.59351), 2020-08-17
Supplement: supp [file elife-59351-supp-v1.zip › elife_poa_e59351_Supplementary_file_1.xls]

## Sheet: Sheet1
Construct	Number of independent embryos	AP Bin/Egg length	1 / 0%	2 / 2.5%	3 / 5%	4 / 7.5%	5 / 10%	6 / 12.5%`	7 / 15%	8 / 17.5%	9 / 20%	10 / 22.5%	11 / 25%	12 / 27.5%	13 / 30 %	14 / 32.5%	15 /35%	16 /37.5%	17 / 40%	18 / 42.5%	19 / 45 %	20 / 47.5%	21 / 50%	22 / 52.5%	23 / 55%	24 / 57.5%	25 / 60%	26 / 62.5%	27 / 65%	28 / 67.5%	29 / 70%	30 / 72.5%	31 / 75%	32 / 77.5%	33 / 80 %	24 / 82.5%	35 / 85%	36 / 87.5%	37 / 90%	38 / 92.5%	39 /95%	40 / 97.5%	41 / 100%
Kr Distal	11		0	0	0	0	0	0	0	0	0	0	0	0	0	0	0	1	28	80	116	176	193	194	220	185	213	170	107	73	25	15	2	2	2	0	0	0	0	0	0	0	0
Kr Proximal	11		0	0	0	0	0	0	0	0	0	0	8	6	4	1	1	14	18	74	141	222	200	169	136	88	18	4	0	0	0	0	0	0	0	0	0	0	0	0	0	0	0
2x Distal	8		0	0	0	0	0	0	0	0	0	0	0	0	0	0	0	0	10	30	64	129	126	159	176	175	178	165	133	100	40	11	7	0	0	0	0	0	0	0	0	0	0
2x Proximal	10		0	0	0	0	0	0	0	0	0	0	0	0	0	0	0	2	12	61	167	191	200	200	164	89	18	1	0	0	0	0	0	0	0	0	0	0	0	0	0	0	0
Shadow Pair	11		0	0	0	0	0	0	0	0	0	3	3	2	1	2	0	2	21	126	173	219	190	240	171	153	121	59	21	8	5	0	1	0	0	0	0	0	0	0	0	0	0
Distal 32C	6		0	0	0	0	0	0	0	0	0	0	0	0	0	0	0	4	8	46	78	88	104	118	79	74	62	44	48	21	10	7	1	0	0	0	0	0	0	0	0	0	0
Proxmial 32C	7		0	0	0	0	0	0	0	0	0	0	0	0	0	0	0	17	31	85	120	133	118	144	126	66	12	0	0	0	0	0	0	0	0	0	0	0	0	0	0	0	0
Shadow Pair 32C	13		0	0	0	0	0	0	0	0	0	0	0	0	0	3	2	26	77	140	187	209	205	185	184	134	110	60	8	2	1	3	0	0	0	0	0	0	0	0	0	0	0
2xProxmial 32C	12		0	0	0	0	0	0	0	0	0	4	7	2	4	1	6	20	38	104	193	191	179	169	143	103	45	1	0	0	0	0	0	0	0	0	0	0	0	0	0	0	0
Distal 17C	11		0	0	0	0	0	0	0	0	0	0	0	0	0	0	1	2	32	97	143	190	208	242	214	215	185	187	127	20	8	0	0	0	0	0	0	0	0	0	0	0	0
2XDistal 32C	8		0	0	0	0	0	0	0	0	0	0	0	0	0	0	0	0	2	48	83	172	130	185	159	158	166	128	108	73	51	17	0	0	0	0	0	0	0	0	0	0	0
Shadow Pair 17C	5		0	0	0	0	0	0	0	0	0	0	0	0	0	0	0	16	33	37	73	103	95	97	102	99	92	49	4	0	0	0	0	0	0	0	0	0	0	0	0	0	0
2xDistal 17C	8		0	0	0	0	0	0	0	0	0	0	0	0	0	0	0	0	6	69	146	203	182	203	199	185	150	147	118	46	7	0	0	0	0	0	0	0	0	0	0	0	0
Proxmial 17C	3		0	0	0	0	0	0	0	0	0	0	0	0	0	0	0	0	0	14	73	79	79	72	72	61	34	2	0	0	0	0	0	0	0	0	0	0	0	0	0	0	0
2xProximal 17C	7		0	0	0	0	0	0	0	0	0	0	0	0	0	2	1	0	0	27	111	139	143	134	127	68	1	0	0	0	0	0	0	0	0	0	0	0	0	0	0	0	0
Distal endogenous spacing	8		0	0	0	0	0	0	0	0	0	0	0	0	0	0	0	0	5	52	137	170	182	178	173	172	106	72	24	4	0	0	0	0	0	0	0	0	0	0	0	0	0
Distal endogenous spacing 32C	8		0	0	0	0	0	0	0	0	0	0	0	0	0	0	0	4	4	70	85	152	160	168	168	164	124	103	68	24	7	0	0	0	0	0	0	0	0	0	0	0	0
Distal endogenous spacing 17C	4		0	0	0	0	0	0	0	0	0	0	0	0	0	0	0	0	0	49	60	62	79	93	87	89	77	68	54	8	8	2	0	0	0	0	0	0	0	0	0	0	0
