# Supplementary material for: Shadow enhancers can suppress input transcription factor noise through distinct regulatory logic
Source: eLife journal article supplement (doi:10.7554/elife.59351), 2020-08-17
Supplement: supp [file elife-59351-supp-v1.zip › elife_poa_e59351_Supplementary_file_2.xls]

## Sheet: Sheet1
Construct	Number of independent embryos	AP Bin/Egg length	1 / 0%	2 / 2.5%	3 / 5%	4 / 7.5%	5 / 10%	6 / 12.5%`	7 / 15%	8 / 17.5%	9 / 20%	10 / 22.5%	11 / 25%	12 / 27.5%	13 / 30 %	14 / 32.5%	15 /35%	16 /37.5%	17 / 40%	18 / 42.5%	19 / 45 %	20 / 47.5%	21 / 50%	22 / 52.5%	23 / 55%	24 / 57.5%	25 / 60%	26 / 62.5%	27 / 65%	28 / 67.5%	29 / 70%	30 / 72.5%	31 / 75%	32 / 77.5%	33 / 80 %	24 / 82.5%	35 / 85%	36 / 87.5%	37 / 90%	38 / 92.5%	39 /95%	40 / 97.5%	41 / 100%
Shadow pair - BcdGFP	2		0	0	0	0	0	0	0	0	0	0	2	5	13	25	34	41	38	43	38	31	2	0	0	0	0	0	0	0	0	0	0	0	0	0	0	0	0	0	0	0	0
Distal - BcdGFP	3		0	0	0	0	0	0	0	0	0	0	0	0	13	22	26	48	56	58	40	34	36	26	8	0	0	0	0	0	0	0	0	0	0	0	0	0	0	0	0	0	0
