# Supplementary material for: Shadow enhancers can suppress input transcription factor noise through distinct regulatory logic
Source: eLife journal article supplement (doi:10.7554/elife.59351), 2020-08-17
Supplement: supp [file elife-59351-supp-v1.zip › elife_poa_e59351_Supplementary_file_3.xls]

## Sheet: Sheet1
Construct	Number of independent embryos	AP Bin/Egg length	1 / 0%	2 / 2.5%	3 / 5%	4 / 7.5%	5 / 10%	6 / 12.5%`	7 / 15%	8 / 17.5%	9 / 20%	10 / 22.5%	11 / 25%	12 / 27.5%	13 / 30 %	14 / 32.5%	15 /35%	16 /37.5%	17 / 40%	18 / 42.5%	19 / 45 %	20 / 47.5%	21 / 50%	22 / 52.5%	23 / 55%	24 / 57.5%	25 / 60%	26 / 62.5%	27 / 65%	28 / 67.5%	29 / 70%	30 / 72.5%	31 / 75%	32 / 77.5%	33 / 80 %	24 / 82.5%	35 / 85%	36 / 87.5%	37 / 90%	38 / 92.5%	39 /95%	40 / 97.5%	41 / 100%
Distal	11		0	0	0	0	0	0	0	0	0	0	0	0	0	0	2	249	623	1038	1616	1710	1874	1929	1530	1551	1246	809	597	261	145	56	22	23	15	0	0	0	0	0	0	0	0
Proximal	11		0	0	0	0	0	0	0	0	0	53	54	70	37	18	115	181	479	996	1673	1613	1270	973	542	190	62	6	0	0	0	0	0	0	0	0	0	0	0	0	0	0	0
Shadow heterozygotes	12		0	0	0	0	0	0	0	0	0	0	0	0	0	8	20	269	668	1219	1625	2083	2121	1779	1476	1019	521	155	108	120	34	0	0	0	0	0	0	0	0	0	0	0	0
Duplicated Distal	8		0	0	0	0	0	0	0	0	0	0	0	0	0	0	0	76	249	586	1368	1280	1755	1775	1583	1508	1191	1013	717	294	94	83	0	0	0	0	0	0	0	0	0	0	0
Duplicated Proximal	10		0	0	0	0	0	0	0	0	0	0	0	0	20	12	20	114	521	1180	1551	1586	1471	1031	609	171	42	6	0	0	0	0	0	0	0	0	0	0	0	0	0	0	0
Shadow pair	11		0	0	0	0	0	0	0	0	25	33	36	43	27	19	41	181	1023	1477	2012	1842	2472	1550	1250	755	443	222	48	23	12	9	0	0	0	0	0	0	0	0	0	0	0
Distal 32C	6		0	0	0	0	0	0	0	0	0	0	0	0	0	6	27	88	398	664	800	1017	1190	708	580	436	287	291	166	135	117	34	1	0	0	0	0	0	0	0	0	0	0
Proximal 32C	7		0	0	0	0	0	0	0	0	0	0	0	0	0	1	109	226	593	958	1133	1092	1150	799	446	132	13	1	0	0	0	0	0	0	0	0	0	0	0	0	0	0	0
Shadow pair 32C	13		0	0	0	0	0	0	0	0	0	0	9	12	55	31	246	676	1219	1789	2051	2025	1842	1599	888	592	267	79	67	36	10	0	0	0	0	0	0	0	0	0	0	0	0
Duplicated proximal 32C	12		0	0	0	0	0	0	0	0	51	58	36	32	20	57	126	266	640	1199	1475	1455	1317	1012	710	307	31	13	0	2	0	1	0	0	0	0	0	0	0	0	0	0	0
Distal 17C	11		0	0	0	0	0	0	0	2	1	1	0	0	0	3	56	219	728	1373	1745	2056	2368	2094	1851	1375	1199	821	140	55	0	0	0	0	0	0	0	0	0	0	0	0	0
Duplicated distal 32C	8		0	0	0	0	0	0	0	0	0	0	0	0	0	0	6	35	373	701	1517	1349	1884	1475	1339	1278	815	707	438	308	97	0	0	0	0	0	0	0	0	0	0	0	0
Shadow pair 17C	5		0	0	0	0	0	0	0	0	0	0	0	0	0	10	134	261	392	753	1157	1102	1108	1038	922	677	296	43	1	1	0	0	0	0	0	0	0	0	0	0	0	0	0
Duplicated distal 17C	8		0	0	0	0	0	0	0	0	0	0	0	0	0	1	1	90	680	1269	1815	1752	1975	1829	1497	1151	1030	870	328	91	12	0	0	0	0	0	0	0	0	0	0	0	0
Proximal 17C	3		0	0	0	0	0	0	0	0	0	0	0	0	0	0	0	0	85	664	703	691	606	431	312	158	61	12	0	0	0	0	0	0	0	0	0	0	0	0	0	0	0
Duplicated proximal 17C	7		0	0	0	0	0	0	0	0	0	0	0	0	37	8	6	14	211	645	956	1079	922	778	445	43	0	1	0	0	0	0	0	0	0	0	0	0	0	0	0	0	0
Distal endogenous spacing	13		0	0	0	0	0	0	0	0	0	0	0	0	0	3	11	56	565	1548	2340	2852	2894	2063	1453	817	577	303	133	35	11	0	0	0	0	0	0	0	0	0	0	0	0
Distal endogenous spacing 32C	8		0	0	0	0	0	0	0	0	0	0	0	0	0	0	13	43	577	794	1409	1470	1467	1317	1169	825	699	486	178	70	1	0	0	0	0	0	0	0	0	0	0	0	0
Distal endogenous spacing 17C	5		0	0	0	0	0	0	0	0	0	0	0	0	0	0	0	0	384	577	609	762	888	908	849	683	538	364	162	96	61	32	14	29	0	0	0	0	0	0	0	0	0
