# Supplementary material for: Shadow enhancers can suppress input transcription factor noise through distinct regulatory logic
Source: eLife journal article supplement (doi:10.7554/elife.59351), 2020-08-17
Supplement: supp [file elife-59351-supp-v1.zip › elife_poa_e59351_Supplementary_file_4.txt]

>Kr distal 
gggatcctaagttaactataatccaggcttaatcactggatcaataactaagtagcattttccgggatggaaatatgaa
gttacctgcatatgcctaccgatcctgaaaactgctttaacttaatcgacatgcatgatcataaaaagcaatttgctac
aatttatatttttttgcttttccttcttttaagcatctgggatctggatcagaaaagaaaaagtgtaacgcctaccttc
agaaacggattaaattttttcagacaaataatccagccttaagcatggtgattaagcttgatcccctaccaaggggcgt
aatattgacggattttccttaaatccctctgttaatctccggcttagagcgcgacgcgttttttcgcgactccgcctgc
attgttttttttttcagtttcttcaattcgcaagaaggcaggcctatggaccgaatgaggatcataattatggaattcc
taaataaactaagaagggcagtcggcatagtattgatctacctgtaagcgtgggttctatctttgcccctcgcattcga
gactctctagtcacaggtagaccagccttgagttcgtcggcaattaagaagtcaaatttctcttaaaaacaacaaaaaa
tgtcaaagtaaaaacaatgcaaaaaatatgtgtaactgaactaaatccggcttaggattcttgcgtcataaacatgact
agggagccattaaaatttgataatttgcatgtcacttgtgcaccgtaaacgaagccaacacatcggctgaaacccagcg
tcatttatgctatgctatctcactcttttgcataatttttttaaattattgacttgtcttttttacgaatgcaaaggaa
gtacttgtgtacttccgtttttcaaagtccgattttattatctacctgcaatttataatgacaaccaagtttttaacat
tccaaaacgtggttttttgagttcaataagcttcattttttaaaggctcttttcgaaccacattaacatttgcggttac
gtttttgtagaaattttccatagctgcataaaggtacaagtttcatttatttgatgggaaaatgaattagagaccagca
cgatctttaacagaaacaaaaaggcgtggatattgttatatgtacaaaaacaac
>Kr Distal at endogenous spacing
gggatcctaagttaactataatccaggcttaatcactggatcaataactaagtagcattttccgggatggaaatatgaa
gttacctgcatatgcctaccgatcctgaaaactgctttaacttaatcgacatgcatgatcataaaaagcaatttgctac
aatttatatttttttgcttttccttcttttaagcatctgggatctggatcagaaaagaaaaagtgtaacgcctaccttc
agaaacggattaaattttttcagacaaataatccagccttaagcatggtgattaagcttgatcccctaccaaggggcgt
aatattgacggattttccttaaatccctctgttaatctccggcttagagcgcgacgcgttttttcgcgactccgcctgc
attgttttttttttcagtttcttcaattcgcaagaaggcaggcctatggaccgaatgaggatcataattatggaattcc
taaataaactaagaagggcagtcggcatagtattgatctacctgtaagcgtgggttctatctttgcccctcgcattcga
gactctctagtcacaggtagaccagccttgagttcgtcggcaattaagaagtcaaatttctcttaaaaacaacaaaaaa
tgtcaaagtaaaaacaatgcaaaaaatatgtgtaactgaactaaatccggcttaggattcttgcgtcataaacatgact
agggagccattaaaatttgataatttgcatgtcacttgtgcaccgtaaacgaagccaacacatcggctgaaacccagcg
tcatttatgctatgctatctcactcttttgcataatttttttaaattattgacttgtcttttttacgaatgcaaaggaa
gtacttgtgtacttccgtttttcaaagtccgattttattatctacctgcaatttataatgacaaccaagtttttaacat
tccaaaacgtggttttttgagttcaataagcttcattttttaaaggctcttttcgaaccacattaacatttgcggttac
gtttttgtagaaattttccatagctgcataaaggtacaagtttcatttatttgatgggaaaatgaattagagaccagca
cgatctttaacagaaacaaaaaggcgtggatattgttatatgtacaaaaacaaccatggcatatacgtatgtattgtat
atcctaattcggccttcctcttatttaatcacttgcaataattttcaactatacagatcagcaatcaaagttcttgatc
caatcgctatagtaaccagatgcgcaagctgataatttattgaaaacttttttcttaggattcttccatattaagcatt
tcccttgctgtgacctcgattcaaaagaaagcactgatttaatgcaggtaatcgtcaaaaaaataatgtttgatatttt
tttgatcgcgtgccatgggtaactcaataaaatgtttgtgatttatatatgtaaacatcaagtatatagaaaactgagg
tcgggtatactttttgagttcgttcgaaaggggttttccattgcactcaatattatattcaaatagatcttagacgttc
cataacagcttaaggtgcgcggattaggactgacgattaccgactgggtaaagacaagacagaattcaatcctgttctt
gatactttgtcaatggatttatactaaatcataggctcataataccttcttacgttttgcttaatcttcgcgtacatgt
ggtaaccgctattaacgttactatagttactatacactgaccataaataaaaaaaaccaaaccctcaaaaattagaaca
gaaacccaatcgagtgttacaaatttgttaaaaattgtgggcacacttatgggttggcaaacaattaaaaaaccctatc
tgcacccctacggatgcttcatattacaaccgttgcaccccgttttttggtctttacttttaacttttttccgcttttc
cccctttttttattgaaccatttcccctttgatgacaaccctcgttttcacttcatatatttgctcaataattgatata
ttcttgcgaaaaataatatagtttaaaatgttttagcttagcgcgtggtttctttgaaaataaagcttagcgcgattag
aatatgagtttgacccagctttacaaactactcattaatattaaagaataataactaactaaactaattttgttgaccc
aggctcgagctggagacagcggtgaaagacctgggcaaagcggtgtcctataaggggatgtatggcgatgtggccatcg
tcgtgtattccggacagtacgtggaaaacggcgtcaaaaagaacttcctgccggacaacacgatggtgctggggaacac
tcaggcacgcggtctgcgcacctatggctgcattcaggatgcggacgcacagcgcgaaggcattaacgcctctgcccgt
tacccgaaaaactgggtgaccaccggcgatccggcgcgtgagttcaccatgattcagtcagcaccgctgatgctgctgg
ctgaccctgatgagttcgtgtccgtacaactggcgtaatcatggcccttcggggccattgtttctctgtggaggagtcc
atgacgaaagatgaactgattgcccgtctccgctcgctgggtgaacaactgaaccgtgatgtcagcctgacggggacga
aagaagaactggcgctccgtgtggcagagctgaaagaggagcttgatgacacggatgaaactgccggtcaggacacccc
tctcagccgggaaaatgtgctgaccggacatgaaaatgaggtgggatcagcgcagccggataccgtgattctggatacg
tctgaactggtcacggtcgtggcactggtgaagctgcatactgatgcacttcacgccacgcgggatgaacctgtggcat
ttgtgctgccgggaacggcgtttcgtgtctctgccggtgtggcagccgaaatgacagagcgcggcctggccagaatgca
ataacgggaggcgctgtggctgatttcgataacctgttcgatgctgccattgcccgcgccgatgaaacgatacgcgggt
acatgggaacgtcagccaccattacatccggtgagcagtcaggtgcggtgatacgtggtgtttttgatgaccctgaaaa
tatcagctatgccggacagggcgtgcgcgttgaaggctccagcccgtccctgtttgtccggactgatgaggtgcggcag
ctgcggcgtggagacacgctgaccatcggtgaggaaaatttctgggtagatcgggtttcgccggatgatggcggaagtt
gtcatctctggcttggacggggcgtaccgcctgccgttaaccgtcgccgctgaaagggggatgtatggccataaaaggt
cttgagcaggccgttgaaaacctcagccgtatcagcaaaacggcggtgcctggtgccgccgcaatggccattaaccgcg
ttgcttcatccgcgatatcgcagtcggcgtcacaggttgcccgtgagacaaaggtacgccggaaactggtaaaggaaag
ggccaggctgaaaagggccacggtcaaaaatccgcaggccagaatcaaagttaaccggggggatttgcccgtaatcaag
ctgggtaatgcgcgggttgtcctttcgcgccgcaggcgtcgtaaaaaggggcagcgttcatccctgaaaggtggcggca
gcgtgcttgtggtgggtaaccgtcgtattcccggcgcgtttattcagcaactgaaaaatggccggtggcatgtcatgca
gcgtgtggctg
>Kr duplicated distal 
gggatcctaagttaactataatccaggcttaatcactggatcaataactaagtagcattttccgggatggaaatatgaa
gttacctgcatatgcctaccgatcctgaaaactgctttaacttaatcgacatgcatgatcataaaaagcaatttgctac
aatttatatttttttgcttttccttcttttaagcatctgggatctggatcagaaaagaaaaagtgtaacgcctaccttc
agaaacggattaaattttttcagacaaataatccagccttaagcatggtgattaagcttgatcccctaccaaggggcgt
aatattgacggattttccttaaatccctctgttaatctccggcttagagcgcgacgcgttttttcgcgactccgcctgc
attgttttttttttcagtttcttcaattcgcaagaaggcaggcctatggaccgaatgaggatcataattatggaattcc
taaataaactaagaagggcagtcggcatagtattgatctacctgtaagcgtgggttctatctttgcccctcgcattcga
gactctctagtcacaggtagaccagccttgagttcgtcggcaattaagaagtcaaatttctcttaaaaacaacaaaaaa
tgtcaaagtaaaaacaatgcaaaaaatatgtgtaactgaactaaatccggcttaggattcttgcgtcataaacatgact
agggagccattaaaatttgataatttgcatgtcacttgtgcaccgtaaacgaagccaacacatcggctgaaacccagcg
tcatttatgctatgctatctcactcttttgcataatttttttaaattattgacttgtcttttttacgaatgcaaaggaa
gtacttgtgtacttccgtttttcaaagtccgattttattatctacctgcaatttataatgacaaccaagtttttaacat
tccaaaacgtggttttttgagttcaataagcttcattttttaaaggctcttttcgaaccacattaacatttgcggttac
gtttttgtagaaattttccatagctgcataaaggtacaagtttcatttatttgatgggaaaatgaattagagaccagca
cgatctttaacagaaacaaaaaggcgtggatattgttatatgtacaaaaacaaccatggcatatacgtatgtattgtat
atcctaattcggccttcctcttatttaatcacttgcaataattttcaactatacagatcagcaatcaaagttcttgatc
caatcgctatagtaaccagatgcgcaagctgataatttattgaaaacttttttcttaggattcttccatattaagcatt
tcccttgctgtgacctcgattcaaaagaaagcactgatttaatgcaggtaatcgtcaaaaaaataatgtttgatatttt
tttgatcgcgtgccatgggtaactcaataaaatgtttgtgatttatatatgtaaacatcaagtatatagaaaactgagg
tcgggtatactttttgagttcgttcgaaaggggttttccattgcactcaatattatattcaaatagatcttagacgttc
cataacagcttaaggtgcgcggattaggactgacgattaccgactgggtaaagacaagacagaattcaatcctgttctt
gatactttgtcaatggatttatactaaatcataggctcataataccttcttacgttttgcttaatcttcgcgtacatgt
ggtaaccgctattaacgttactatagttactatacactgaccataaataaaaaaaaccaaaccctcaaaaattagaaca
gaaacccaatcgagtgttacaaatttgttaaaaattgtgggcacacttatgggttggcaaacaattaaaaaaccctatc
tgcacccctacggatgcttcatattacaaccgttgcaccccgttttttggtctttacttttaacttttttccgcttttc
cccctttttttattgaaccatttcccctttgatgacaaccctcgttttcacttcatatatttgctcaataattgatata
ttcttgcgaaaaataatatagtttaaaatgttttagcttagcgcgtggtttctttgaaaataaagcttagcgcgattag
aatatgagtttgacccagctttacaaactactcattaatattaaagaataataactaactaaactaattttgttgaccc
aggctgggatcctaagttaactataatccaggcttaatcactggatcaataactaagtagcattttccgggatggaaat
atgaagttacctgcatatgcctaccgatcctgaaaactgctttaacttaatcgacatgcatgatcataaaaagcaattt
gctacaatttatatttttttgcttttccttcttttaagcatctgggatctggatcagaaaagaaaaagtgtaacgccta
ccttcagaaacggattaaattttttcagacaaataatccagccttaagcatggtgattaagcttgatcccctaccaagg
ggcgtaatattgacggattttccttaaatccctctgttaatctccggcttagagcgcgacgcgttttttcgcgactccg
cctgcattgttttttttttcagtttcttcaattcgcaagaaggcaggcctatggaccgaatgaggatcataattatgga
attcctaaataaactaagaagggcagtcggcatagtattgatctacctgtaagcgtgggttctatctttgcccctcgca
ttcgagactctctagtcacaggtagaccagccttgagttcgtcggcaattaagaagtcaaatttctcttaaaaacaaca
aaaaatgtcaaagtaaaaacaatgcaaaaaatatgtgtaactgaactaaatccggcttaggattcttgcgtcataaaca
tgactagggagccattaaaatttgataatttgcatgtcacttgtgcaccgtaaacgaagccaacacatcggctgaaacc
cagcgtcatttatgctatgctatctcactcttttgcataatttttttaaattattgacttgtcttttttacgaatgcaa
aggaagtacttgtgtacttccgtttttcaaagtccgattttattatctacctgcaatttataatgacaaccaagttttt
aacattccaaaacgtggttttttgagttcaataagcttcattttttaaaggctcttttcgaaccacattaacatttgcg
gttacgtttttgtagaaattttccatagctgcataaaggtacaagtttcatttatttgatgggaaaatgaattagagac
cagcacgatctttaacagaaacaaaaaggcgtggatattgttatatgtacaaaaacaac
>Kr duplicated proximal 
gtaagttcccatatttcggaccttatcagcggcctcgaccatacgcactttacacgcacttctgccccattcactcgga
aatctttagttcgctttgccaatcaaaatctagtctatttttcttttactcgctttgatactattctagtttagtgatt
gccgacaaagtcattaacgataaggcccggatcttattaaaatctgttgagcttaagtggatctttcaatatcaagcct
ctgcttatcacgcaaacaaccaaaaaaaatttctgactaatcgccgaaacataggaatcgtatgaagattttctaaaac
cggtcagctcagcccgaaatttaagaatttcttatcaatagggtcagttttaagcgctttgcttgcatattatttaatg
ccttctgcgaattttgttttggtgaaaaactttctatgaagtcgaacattcgatgacaaaaccattataattttacgta
acattatgcagagcaaggatatttgtgtgcctttctgcttttgtttggtttcactttcttaaaatccacggtagttcaa
atttaccacccggtgagctctgagcgtccttggcctacctacaaaaccaaaaataccgattttcaacataaatttaaca
tagcatgtccttgccataaaaatctacataaaaccatttaaaagtcaatccgcaaaagtcacagaaaacgtctatacaa
gcaagaaaatttcaacgatgcagctctcttacaattttttattatatttcctttctacctgaatccgttttttactagt
tcctttttacgatttcttttttagacgtgtgccaataattagttgtccattaaactgaacttccacgtctttgagactt
tgctcaacaggctacaaggaagacaaaaaactcactcagtatagctggtaaaaaaccgtcgaccttctttcttactttc
tgcactccttaagccgatgttttgtttacttcctgtttactcgtacagcgcacgcttgaaattcaaccccgtccgtgac
atctcttttcatgaattttggctcttttgctctcgctgtttcattttcgccctgttctccattggcgttcatccccctt
agacacattagttattttctatagctcaaatgtaaaaaggggaaatgacaaaggcacatctgagtgagtttttgttgtg
cgtcccttactaactctaaaaacttctacgtgatctttatgtggtgtaatattcctgcaagtgcagtttttatgaaggc
tctaaaaaacacaagcggaagtggtcataagcattaaaaaatgtcctttaacggtcaacacatagttctgattttttat
gttttattactgactagaaacgtaaaggtcataaaaccctctactcagcgaagataattcgcatcgacaacctatgtta
aaaaaccacatcgtccatatttgactctaactgactatatatcttttgcattgaaaggaacctctagctgtctcattcg
caccaatttgcatatgaaaaattagcacttttaggtataaaaaggaatcgatgaaatcaactcactcaactcagcgaag
tacccacatggcatatacgtatgtattgtatatcctaattcggccttcctcttatttaatcacttgcaataattttcaa
ctatacagatcagcaatcaaagttcttgatccaatcgctatagtaaccagatgcgcaagctgataatttattgaaaact
tttttcttaggattcttccatattaagcatttcccttgctgtgacctcgattcaaaagaaagcactgatttaatgcagg
taatcgtcaaaaaaataatgtttgatatttttttgatcgcgtgccatgggtaactcaataaaatgtttgtgatttatat
atgtaaacatcaagtatatagaaaactgaggtcgggtatactttttgagttcgttcgaaaggggttttccattgcactc
aatattatattcaaatagatcttagacgttccataacagcttaaggtgcgcggattaggactgacgattaccgactggg
taaagacaagacagaattcaatcctgttcttgatactttgtcaatggatttatactaaatcataggctcataatacctt
cttacgttttgcttaatcttcgcgtacatgtggtaaccgctattaacgttactatagttactatacactgaccataaat
aaaaaaaaccaaaccctcaaaaattagaacagaaacccaatcgagtgttacaaatttgttaaaaattgtgggcacactt
atgggttggcaaacaattaaaaaaccctatctgcacccctacggatgcttcatattacaaccgttgcaccccgtttttt
ggtctttacttttaacttttttccgcttttccccctttttttattgaaccatttcccctttgatgacaaccctcgtttt
cacttcatatatttgctcaataattgatatattcttgcgaaaaataatatagtttaaaatgttttagcttagcgcgtgg
tttctttgaaaataaagcttagcgcgattagaatatgagtttgacccagctttacaaactactcattaatattaaagaa
taataactaactaaactaattttgttgacccagtgtaagttcccatatttcggaccttatcagcggcctcgaccatacg
cactttacacgcacttctgccccattcactcggaaatctttagttcgctttgccaatcaaaatctagtctatttttctt
ttactcgctttgatactattctagtttagtgattgccgacaaagtcattaacgataaggcccggatcttattaaaatct
gttgagcttaagtggatctttcaatatcaagcctctgcttatcacgcaaacaaccaaaaaaaatttctgactaatcgcc
gaaacataggaatcgtatgaagattttctaaaaccggtcagctcagcccgaaatttaagaatttcttatcaatagggtc
agttttaagcgctttgcttgcatattatttaatgccttctgcgaattttgttttggtgaaaaactttctatgaagtcga
acattcgatgacaaaaccattataattttacgtaacattatgcagagcaaggatatttgtgtgcctttctgcttttgtt
tggtttcactttcttaaaatccacggtagttcaaatttaccacccggtgagctctgagcgtccttggcctacctacaaa
accaaaaataccgattttcaacataaatttaacatagcatgtccttgccataaaaatctacataaaaccatttaaaagt
caatccgcaaaagtcacagaaaacgtctatacaagcaagaaaatttcaacgatgcagctctcttacaattttttattat
atttcctttctacctgaatccgttttttactagttcctttttacgatttcttttttagacgtgtgccaataattagttg
tccattaaactgaacttccacgtctttgagactttgctcaacaggctacaaggaagacaaaaaactcactcagtatagc
tggtaaaaaaccgtcgaccttctttcttactttctgcactccttaagccgatgttttgtttacttcctgtttactcgta
cagcgcacgcttgaaattcaaccccgtccgtgacatctcttttcatgaattttggctcttttgctctcgctgtttcatt
ttcgccctgttctccattggcgttcatcccccttagacacattagttattttctatagctcaaatgtaaaaaggggaaa
tgacaaaggcacatctgagtgagtttttgttgtgcgtcccttactaactctaaaaacttctacgtgatctttatgtggt
gtaatattcctgcaagtgcagtttttatgaaggctctaaaaaacacaagcggaagtggtcataagcattaaaaaatgtc
ctttaacggtcaacacatagttctgattttttatgttttattactgactagaaacgtaaaggtcataaaaccctctact
cagcgaagataattcgcatcgacaacctatgttaaaaaaccacatcgtccatatttgactctaactgactatatatctt
ttgcattgaaaggaacctctagctgtctcattcgcaccaatttgcatatgaaaaattagcacttttaggtataaaaagg
aatcgatgaaatcaactcactcaactcagcgaagtaccca
>Kr proximal 
gtaagttcccatatttcggaccttatcagcggcctcgaccatacgcactttacacgcacttctgccccattcactcgga
aatctttagttcgctttgccaatcaaaatctagtctatttttcttttactcgctttgatactattctagtttagtgatt
gccgacaaagtcattaacgataaggcccggatcttattaaaatctgttgagcttaagtggatctttcaatatcaagcct
ctgcttatcacgcaaacaaccaaaaaaaatttctgactaatcgccgaaacataggaatcgtatgaagattttctaaaac
cggtcagctcagcccgaaatttaagaatttcttatcaatagggtcagttttaagcgctttgcttgcatattatttaatg
ccttctgcgaattttgttttggtgaaaaactttctatgaagtcgaacattcgatgacaaaaccattataattttacgta
acattatgcagagcaaggatatttgtgtgcctttctgcttttgtttggtttcactttcttaaaatccacggtagttcaa
atttaccacccggtgagctctgagcgtccttggcctacctacaaaaccaaaaataccgattttcaacataaatttaaca
tagcatgtccttgccataaaaatctacataaaaccatttaaaagtcaatccgcaaaagtcacagaaaacgtctatacaa
gcaagaaaatttcaacgatgcagctctcttacaattttttattatatttcctttctacctgaatccgttttttactagt
tcctttttacgatttcttttttagacgtgtgccaataattagttgtccattaaactgaacttccacgtctttgagactt
tgctcaacaggctacaaggaagacaaaaaactcactcagtatagctggtaaaaaaccgtcgaccttctttcttactttc
tgcactccttaagccgatgttttgtttacttcctgtttactcgtacagcgcacgcttgaaattcaaccccgtccgtgac
atctcttttcatgaattttggctcttttgctctcgctgtttcattttcgccctgttctccattggcgttcatccccctt
agacacattagttattttctatagctcaaatgtaaaaaggggaaatgacaaaggcacatctgagtgagtttttgttgtg
cgtcccttactaactctaaaaacttctacgtgatctttatgtggtgtaatattcctgcaagtgcagtttttatgaaggc
tctaaaaaacacaagcggaagtggtcataagcattaaaaaatgtcctttaacggtcaacacatagttctgattttttat
gttttattactgactagaaacgtaaaggtcataaaaccctctactcagcgaagataattcgcatcgacaacctatgtta
aaaaaccacatcgtccatatttgactctaactgactatatatcttttgcattgaaaggaacctctagctgtctcattcg
caccaatttgcatatgaaaaattagcacttttaggtataaaaaggaatcgatgaaatcaactcactcaactcagcgaag
taccca
>Kr shadow enhancer pair
gggatcctaagttaactataatccaggcttaatcactggatcaataactaagtagcattttccgggatggaaatatgaa
gttacctgcatatgcctaccgatcctgaaaactgctttaacttaatcgacatgcatgatcataaaaagcaatttgctac
aatttatatttttttgcttttccttcttttaagcatctgggatctggatcagaaaagaaaaagtgtaacgcctaccttc
agaaacggattaaattttttcagacaaataatccagccttaagcatggtgattaagcttgatcccctaccaaggggcgt
aatattgacggattttccttaaatccctctgttaatctccggcttagagcgcgacgcgttttttcgcgactccgcctgc
attgttttttttttcagtttcttcaattcgcaagaaggcaggcctatggaccgaatgaggatcataattatggaattcc
taaataaactaagaagggcagtcggcatagtattgatctacctgtaagcgtgggttctatctttgcccctcgcattcga
gactctctagtcacaggtagaccagccttgagttcgtcggcaattaagaagtcaaatttctcttaaaaacaacaaaaaa
tgtcaaagtaaaaacaatgcaaaaaatatgtgtaactgaactaaatccggcttaggattcttgcgtcataaacatgact
agggagccattaaaatttgataatttgcatgtcacttgtgcaccgtaaacgaagccaacacatcggctgaaacccagcg
tcatttatgctatgctatctcactcttttgcataatttttttaaattattgacttgtcttttttacgaatgcaaaggaa
gtacttgtgtacttccgtttttcaaagtccgattttattatctacctgcaatttataatgacaaccaagtttttaacat
tccaaaacgtggttttttgagttcaataagcttcattttttaaaggctcttttcgaaccacattaacatttgcggttac
gtttttgtagaaattttccatagctgcataaaggtacaagtttcatttatttgatgggaaaatgaattagagaccagca
cgatctttaacagaaacaaaaaggcgtggatattgttatatgtacaaaaacaaccatggcatatacgtatgtattgtat
atcctaattcggccttcctcttatttaatcacttgcaataattttcaactatacagatcagcaatcaaagttcttgatc
caatcgctatagtaaccagatgcgcaagctgataatttattgaaaacttttttcttaggattcttccatattaagcatt
tcccttgctgtgacctcgattcaaaagaaagcactgatttaatgcaggtaatcgtcaaaaaaataatgtttgatatttt
tttgatcgcgtgccatgggtaactcaataaaatgtttgtgatttatatatgtaaacatcaagtatatagaaaactgagg
tcgggtatactttttgagttcgttcgaaaggggttttccattgcactcaatattatattcaaatagatcttagacgttc
cataacagcttaaggtgcgcggattaggactgacgattaccgactgggtaaagacaagacagaattcaatcctgttctt
gatactttgtcaatggatttatactaaatcataggctcataataccttcttacgttttgcttaatcttcgcgtacatgt
ggtaaccgctattaacgttactatagttactatacactgaccataaataaaaaaaaccaaaccctcaaaaattagaaca
gaaacccaatcgagtgttacaaatttgttaaaaattgtgggcacacttatgggttggcaaacaattaaaaaaccctatc
tgcacccctacggatgcttcatattacaaccgttgcaccccgttttttggtctttacttttaacttttttccgcttttc
cccctttttttattgaaccatttcccctttgatgacaaccctcgttttcacttcatatatttgctcaataattgatata
ttcttgcgaaaaataatatagtttaaaatgttttagcttagcgcgtggtttctttgaaaataaagcttagcgcgattag
aatatgagtttgacccagctttacaaactactcattaatattaaagaataataactaactaaactaattttgttgaccc
aggctgtaagttcccatatttcggaccttatcagcggcctcgaccatacgcactttacacgcacttctgccccattcac
tcggaaatctttagttcgctttgccaatcaaaatctagtctatttttcttttactcgctttgatactattctagtttag
tgattgccgacaaagtcattaacgataaggcccggatcttattaaaatctgttgagcttaagtggatctttcaatatca
agcctctgcttatcacgcaaacaaccaaaaaaaatttctgactaatcgccgaaacataggaatcgtatgaagattttct
aaaaccggtcagctcagcccgaaatttaagaatttcttatcaatagggtcagttttaagcgctttgcttgcatattatt
taatgccttctgcgaattttgttttggtgaaaaactttctatgaagtcgaacattcgatgacaaaaccattataatttt
acgtaacattatgcagagcaaggatatttgtgtgcctttctgcttttgtttggtttcactttcttaaaatccacggtag
ttcaaatttaccacccggtgagctctgagcgtccttggcctacctacaaaaccaaaaataccgattttcaacataaatt
taacatagcatgtccttgccataaaaatctacataaaaccatttaaaagtcaatccgcaaaagtcacagaaaacgtcta
tacaagcaagaaaatttcaacgatgcagctctcttacaattttttattatatttcctttctacctgaatccgtttttta
ctagttcctttttacgatttcttttttagacgtgtgccaataattagttgtccattaaactgaacttccacgtctttga
gactttgctcaacaggctacaaggaagacaaaaaactcactcagtatagctggtaaaaaaccgtcgaccttctttctta
ctttctgcactccttaagccgatgttttgtttacttcctgtttactcgtacagcgcacgcttgaaattcaaccccgtcc
gtgacatctcttttcatgaattttggctcttttgctctcgctgtttcattttcgccctgttctccattggcgttcatcc
cccttagacacattagttattttctatagctcaaatgtaaaaaggggaaatgacaaaggcacatctgagtgagtttttg
ttgtgcgtcccttactaactctaaaaacttctacgtgatctttatgtggtgtaatattcctgcaagtgcagtttttatg
aaggctctaaaaaacacaagcggaagtggtcataagcattaaaaaatgtcctttaacggtcaacacatagttctgattt
tttatgttttattactgactagaaacgtaaaggtcataaaaccctctactcagcgaagataattcgcatcgacaaccta
tgttaaaaaaccacatcgtccatatttgactctaactgactatatatcttttgcattgaaaggaacctctagctgtctc
attcgcaccaatttgcatatgaaaaattagcacttttaggtataaaaaggaatcgatgaaatcaactcactcaactcag
cgaagtaccca
>Lambda replacement of Kr proximal
cgagctggagacagcggtgaaagacctgggcaaagcggtgtcctataaggggatgtatggcgatgtggccatcgtcgtg
tattccggacagtacgtggaaaacggcgtcaaaaagaacttcctgccggacaacacgatggtgctggggaacactcagg
cacgcggtctgcgcacctatggctgcattcaggatgcggacgcacagcgcgaaggcattaacgcctctgcccgttaccc
gaaaaactgggtgaccaccggcgatccggcgcgtgagttcaccatgattcagtcagcaccgctgatgctgctggctgac
cctgatgagttcgtgtccgtacaactggcgtaatcatggcccttcggggccattgtttctctgtggaggagtccatgac
gaaagatgaactgattgcccgtctccgctcgctgggtgaacaactgaaccgtgatgtcagcctgacggggacgaaagaa
gaactggcgctccgtgtggcagagctgaaagaggagcttgatgacacggatgaaactgccggtcaggacacccctctca
gccgggaaaatgtgctgaccggacatgaaaatgaggtgggatcagcgcagccggataccgtgattctggatacgtctga
actggtcacggtcgtggcactggtgaagctgcatactgatgcacttcacgccacgcgggatgaacctgtggcatttgtg
ctgccgggaacggcgtttcgtgtctctgccggtgtggcagccgaaatgacagagcgcggcctggccagaatgcaataac
gggaggcgctgtggctgatttcgataacctgttcgatgctgccattgcccgcgccgatgaaacgatacgcgggtacatg
ggaacgtcagccaccattacatccggtgagcagtcaggtgcggtgatacgtggtgtttttgatgaccctgaaaatatca
gctatgccggacagggcgtgcgcgttgaaggctccagcccgtccctgtttgtccggactgatgaggtgcggcagctgcg
gcgtggagacacgctgaccatcggtgaggaaaatttctgggtagatcgggtttcgccggatgatggcggaagttgtcat
ctctggcttggacggggcgtaccgcctgccgttaaccgtcgccgctgaaagggggatgtatggccataaaaggtcttga
gcaggccgttgaaaacctcagccgtatcagcaaaacggcggtgcctggtgccgccgcaatggccattaaccgcgttgct
tcatccgcgatatcgcagtcggcgtcacaggttgcccgtgagacaaaggtacgccggaaactggtaaaggaaagggcca
ggctgaaaagggccacggtcaaaaatccgcaggccagaatcaaagttaaccggggggatttgcccgtaatcaagctggg
taatgcgcgggttgtcctttcgcgccgcaggcgtcgtaaaaaggggcagcgttcatccctgaaaggtggcggcagcgtg
cttgtggtgggtaaccgtcgtattcccggcgcgtttattcagcaactgaaaaatggccggtggcatgtcatgcagcgtg
tggctg
>promoter proximal sequence_Kr promoter
TTTTTACTTTACCTGCTCAGGCTTGGGGATCGTTTTTCGCTTTCGCCGTGATGATTTCCCTTCCTGTCTGCACCCTTAT
TTGCGTGCGTGTGAGCGGGAGAGCCAATTGAGTCCCGGCGTGTGTGCGTACGAGGGTGAGTGAGAATCTTTCGCCGAGA
CAGAGCGTACTTATAGTTAGCTCACGCAGCGAATTTGTATCAGTCGTGATTTGGCTCTGTCAGCGAAAGGAACAACCAT
TTGTTGTGCCACACACAACCGCGAGTAATATAATCGAATCAAATTTCAACTACCTCATTTTGCTAAATCGGTAAACTTT
TATAAAAGACAATTTTTGTGAAATCTCTCTACCTCAAAGTACAAAAGTGTGTACAAAAATTATTCATATCCCTGAAAGT
GCACAAATTGCTCAAATGAAATTTTGTTGTCTAAAAAACTGAAGCTCCAAAACCACGAAGGCGAATATTATAGGTGTTT
TCTGTGTGCGGGAAAACATTGCGCGAGCACAAAATTAGGAGCACAAGAAGAATTTGTTG
